# Supplementary material
Source: ML conference proceedings conference paper supplement (https://openreview.net/forum?id=JH1mMoGtyl)
Supplement: supplementary_material [file grf.xlsx]

## Sheet: 2_vs_2
1	Own absolute position X	continuous[-1,1]	Two attacking players coordinate near the edge of the penalty box in an attempt to score against a goalkeeper. One attacker is positioned on the wing with the ball, closely marked by a defender. The other attacker is centrally located, unmarked, and facing the goal. The key to success is for the winger to pass at the right moment, enabling a clean shot from the center player.
2	Own absolute position Y	continuous[-1,1]
3	Ally Agent1 relative position X	continuous[-1,1]
4	Ally Agent1 relative position Y	continuous[-1,1]
5	Ego Agent direction X	continuous[-1,1]
6	Ego Agent direction Y	continuous[-1,1]
7	Ally Agent1 direction X	continuous[-1,1]
8	Ally Agent1 direction Y	continuous[-1,1]
9	Enemy goalkeeper relative position X	continuous[-1,1]
10	Enemy goalkeeper relative position Y	continuous[-1,1]
11	Enemy center-back relative position X	continuous[-1,1]
12	Enemy center-back relative position Y	continuous[-1,1]
13	Enemy goalkeeper direction X	continuous[-1,1]
14	Enemy goalkeeper direction Y	continuous[-1,1]
15	Enemy center-back direction X	continuous[-1,1]
16	Enemy center-back direction Y	continuous[-1,1]
17	Ball relative position X	continuous[-1,1]
18	Ball relative position Y	continuous[-1,1]
19	Ball absolute position Z	continuous[-1,1]
20	Ball direction X	continuous[-1,1]
21	Ball direction Y	continuous[-1,1]
22	Ball direction Z	continuous[-1,1]
23	Ego Agent Last Action-Idle	categorical[0 or 1]
24	Ego Agent Last Action-Left	categorical[0 or 1]
25	Ego Agent Last Action-TopLeft	categorical[0 or 1]
26	Ego Agent Last Action-Top	categorical[0 or 1]
27	Ego Agent Last Action-TopRight	categorical[0 or 1]
28	Ego Agent Last Action-Right	categorical[0 or 1]
29	Ego Agent Last Action-BottomRight	categorical[0 or 1]
30	Ego Agent Last Action-Bottom	categorical[0 or 1]
31	Ego Agent Last Action-BottomLeft	categorical[0 or 1]
32	Ego Agent Last Action-LongPass	categorical[0 or 1]
33	Ego Agent Last Action-HighPass	categorical[0 or 1]
34	Ego Agent Last Action-ShortPass	categorical[0 or 1]
35	Ego Agent Last Action-Shot	categorical[0 or 1]
36	Ego Agent Last Action-Sprint	categorical[0 or 1]
37	Ego Agent Last Action-ReleaseDirection	categorical[0 or 1]
38	Ego Agent Last Action-ReleaseSprint	categorical[0 or 1]
39	Ego Agent Last Action-Sliding	categorical[0 or 1]
40	Ego Agent Last Action-Dribble	categorical[0 or 1]
41	Ego Agent Last Action-ReleaseDribble	categorical[0 or 1]
42	Is this Attacker1	categorical[0 or 1]
43	Is this Attacker2	categorical[0 or 1]

## Sheet: 2_vs_2(state)
1	Agent Attacker1 absolute position X	continuous[-1,1]	Two attacking players coordinate near the edge of the penalty box in an attempt to score against a goalkeeper. One attacker is positioned on the wing with the ball, closely marked by a defender. The other attacker is centrally located, unmarked, and facing the goal. The key to success is for the winger to pass at the right moment, enabling a clean shot from the center player.
2	Agent Attacker1 absolute position Y	continuous[-1,1]
3	Agent Attackerk2 absolute position X	continuous[-1,1]
4	Agent Attacker2 absolute position Y	continuous[-1,1]
5	Agent Attacker1 direction X	continuous[-1,1]
6	Agent Attacker1 direction Y	continuous[-1,1]
7	Agent Attacker2 direction X	continuous[-1,1]
8	Agent Attacker2 direction Y	continuous[-1,1]
9	Enemy goalkeeper absolute position X	continuous[-1,1]
10	Enemy goalkeeper absolute position Y	continuous[-1,1]
11	Enemy center-back absolute position X	continuous[-1,1]
12	Enemy center-back absolute position Y	continuous[-1,1]
13	Enemy goalkeeper direction X	continuous[-1,1]
14	Enemy goalkeeper direction Y	continuous[-1,1]
15	Enemy center-back direction X	continuous[-1,1]
16	Enemy center-back direction Y	continuous[-1,1]
17	Ball absolute position X	continuous[-1,1]
18	Ball absolute position Y	continuous[-1,1]
19	Ball absolute position Z	continuous[-1,1]
20	Ball direction X	continuous[-1,1]
21	Ball direction Y	continuous[-1,1]
22	Ball direction Z	continuous[-1,1]

## Sheet: 3_vs_2
1	Own absolute position X	continuous[-1,1]	Three attackers face off against one center-back and a goalkeeper near the edge of the box. The attackers are spread out with one on each wing and one in the center. The central player initially holds the ball and must make a strategic decision to either dribble or pass, coordinating with teammates to create a high-quality scoring opportunity despite the defensive pressure.
2	Own absolute position Y	continuous[-1,1]
3	Ally Agent1 relative position X	continuous[-1,1]
4	Ally Agent1 relative position Y	continuous[-1,1]
5	Ally Agent2 relative position X	continuous[-1,1]
6	Ally Agent2 relative position Y	continuous[-1,1]
7	Ego Agent direction X	continuous[-1,1]
8	Ego Agent direction Y	continuous[-1,1]
9	Ally Agent1 direction X	continuous[-1,1]
10	Ally Agent1 direction Y	continuous[-1,1]
11	Ally Agent2 direction X	continuous[-1,1]
12	Ally Agent2 direction Y	continuous[-1,1]
13	Enemy goalkeeper relative position X	continuous[-1,1]
14	Enemy goalkeeper relative position Y	continuous[-1,1]
15	Enemy center-back relative position X	continuous[-1,1]
16	Enemy center-back relative position Y	continuous[-1,1]
17	Enemy goalkeeper direction X	continuous[-1,1]
18	Enemy goalkeeper direction Y	continuous[-1,1]
19	Enemy center-back direction X	continuous[-1,1]
20	Enemy center-back direction Y	continuous[-1,1]
21	Ball relative position X	continuous[-1,1]
22	Ball relative position Y	continuous[-1,1]
23	Ball absolute position Z	continuous[-1,1]
24	Ball direction X	continuous[-1,1]
25	Ball direction Y	continuous[-1,1]
26	Ball direction Z	continuous[-1,1]
27	Ego Agent Last Action-Idle	categorical[0 or 1]
28	Ego Agent Last Action-Left	categorical[0 or 1]
29	Ego Agent Last Action-TopLeft	categorical[0 or 1]
30	Ego Agent Last Action-Top	categorical[0 or 1]
31	Ego Agent Last Action-TopRight	categorical[0 or 1]
32	Ego Agent Last Action-Right	categorical[0 or 1]
33	Ego Agent Last Action-BottomRight	categorical[0 or 1]
34	Ego Agent Last Action-Bottom	categorical[0 or 1]
35	Ego Agent Last Action-BottomLeft	categorical[0 or 1]
36	Ego Agent Last Action-LongPass	categorical[0 or 1]
37	Ego Agent Last Action-HighPass	categorical[0 or 1]
38	Ego Agent Last Action-ShortPass	categorical[0 or 1]
39	Ego Agent Last Action-Shot	categorical[0 or 1]
40	Ego Agent Last Action-Sprint	categorical[0 or 1]
41	Ego Agent Last Action-ReleaseDirection	categorical[0 or 1]
42	Ego Agent Last Action-ReleaseSprint	categorical[0 or 1]
43	Ego Agent Last Action-Sliding	categorical[0 or 1]
44	Ego Agent Last Action-Dribble	categorical[0 or 1]
45	Ego Agent Last Action-ReleaseDribble	categorical[0 or 1]
46	Is this center-midfielder1	categorical[0 or 1]
47	Is this center-midfielder2	categorical[0 or 1]
48	Is this center-midfielder3	categorical[0 or 1]

## Sheet: 3_vs_2(state)
1	Agent center-midfielder1 absolute position X	continuous[-1,1]	Three attackers face off against one center-back and a goalkeeper near the edge of the box. The attackers are spread out with one on each wing and one in the center. The central player initially holds the ball and must make a strategic decision to either dribble or pass, coordinating with teammates to create a high-quality scoring opportunity despite the defensive pressure.
2	Agent center-midfielder1 absolute position Y	continuous[-1,1]
3	Agent center-midfielder2 absolute position X	continuous[-1,1]
4	Agent center-midfielder2 absolute position Y	continuous[-1,1]
5	Agent center-midfielder3 absolute position X	continuous[-1,1]
6	Agent center-midfielder3 absolute position Y	continuous[-1,1]
7	Agent center-midfielder1 direction X	continuous[-1,1]
8	Agent center-midfielder1 direction Y	continuous[-1,1]
9	Agent center-midfielder2 direction X	continuous[-1,1]
10	Agent center-midfielder2 direction Y	continuous[-1,1]
11	Agent center-midfielder3 direction X	continuous[-1,1]
12	Agent center-midfielder3 direction Y	continuous[-1,1]
13	Enemy goalkeeper absolute position X	continuous[-1,1]
14	Enemy goalkeeper absolute position Y	continuous[-1,1]
15	Enemy center-back absolute position X	continuous[-1,1]
16	Enemy center-back absolute position Y	continuous[-1,1]
17	Enemy goalkeeper direction X	continuous[-1,1]
18	Enemy goalkeeper direction Y	continuous[-1,1]
19	Enemy center-back direction X	continuous[-1,1]
20	Enemy center-back direction Y	continuous[-1,1]
21	Ball absolute position X	continuous[-1,1]
22	Ball absolute position Y	continuous[-1,1]
23	Ball absolute position Z	continuous[-1,1]
24	Ball direction X	continuous[-1,1]
25	Ball direction Y	continuous[-1,1]
26	Ball direction Z	continuous[-1,1]
