# Supplementary material
Source: ML conference proceedings conference paper supplement (https://openreview.net/forum?id=JH1mMoGtyl)
Supplement: supplementary_material [file sc2.xlsx]

## Sheet: 5z_vs_1ul
1	can move North at the current timestep	0	1	categorical[0 or 1]	The 5z_vs_1ul map in SMAC (StarCraft Multi-Agent Challenge) features five Zealots controlled by the agents against one Ultralisk as the enemy. The Ultralisk has high health and strong melee attacks, requiring coordinated micro-management from the Zealots to win. The challenge emphasizes some tactics such as kiting strategies, positioning, and focus fire to maximize damage while minimizing losses.
2	can move South at the current timestep	0	1	categorical[0 or 1]
3	can move East at the current timestep	0	1	categorical[0 or 1]
4	can move West at the current timestep	0	1	categorical[0 or 1]
5	Is enemy visible	0	1	categorical[0 or 1]
6	Relative X position of enemy	0	1	continuous
7	Relative Y position of enemy	0	1	continuous
8	Normalized distance to enemy	0	1	continuous
9	Enemy health ratio	0	1	continuous
10	Enemy shield ratio	0	1	continuous
11	Is ally visible	0	1	categorical[0 or 1]
12	Normalized distance to ally1	0	1	continuous
13	Relative X position of ally1	0	1	continuous
14	Relative Y position of ally1	0	1	continuous
15	Ally health ratio	0	1	continuous
16	Ally shield ratio	0	1	continuous
17	Is ally visible	0	1	categorical[0 or 1]
18	Normalized distance to ally2	0	1	continuous
19	Relative X position of ally2	0	1	continuous
20	Relative Y position of ally2	0	1	continuous
21	Ally health ratio	0	1	continuous
22	Ally shield ratio	0	1	continuous
23	Is ally visible	0	1	categorical[0 or 1]
24	Normalized distance to ally3	0	1	continuous
25	Relative X position of ally3	0	1	continuous
26	Relative Y position of ally3	0	1	continuous
27	Ally health ratio	0	1	continuous
28	Ally shield ratio	0	1	continuous
29	Is ally visible	0	1	categorical[0 or 1]
30	Normalized distance to ally4	0	1	continuous
31	Relative X position of ally4	0	1	continuous
32	Relative Y position of ally4	0	1	continuous
33	Ally health ratio	0	1	continuous
34	Ally shield ratio	0	1	continuous
35	Own health ratio	0	1	continuous
36	Own shield ratio	0	1	continuous
37	Last Action-No-op(all last action:0)	0	1	categorical[0 or 1]
38	Last Action-Stop	0	1	categorical[0 or 1]
39	Last Action-Move North	0	1	categorical[0 or 1]
40	Last Action-Move South	0	1	categorical[0 or 1]
41	Last Action-Move East	0	1	categorical[0 or 1]
42	Last Action-Move West	0	1	categorical[0 or 1]
43	Last Action-Attack	0	1	categorical[0 or 1]
44	AgentID[0]	0	1	categorical[0 or 1]
45	AgentID[1]	0	1	categorical[0 or 1]
46	AgentID[2]	0	1	categorical[0 or 1]
47	AgentID[3]	0	1	categorical[0 or 1]
48	AgentID[4]	0	1	categorical[0 or 1]

## Sheet: 5z_vs_1ul(state)
1	Agent 0 health	0	1	continuous[0,1]	The 5z_vs_1ul map in SMAC (StarCraft Multi-Agent Challenge) features five Zealots controlled by the agents against one Ultralisk as the enemy. The Ultralisk has high health and strong melee attacks, requiring coordinated micro-management from the Zealots to win. The challenge emphasizes some tactics such as kiting strategies, positioning, and focus fire to maximize damage while minimizing losses.
2	Agent 0 weapon_cooldown	0	1	continuous[0,1]
3	Agent 0 absolute X coordination	0	1	continuous[0,1]
4	Agent 0 absolute Y coordination	0	1	continuous[0,1]
5	Agent 0 shield	0	1	continuous[0,1]
6	Agent 1 health	0	1	continuous[0,1]
7	Agent 1 weapon_cooldown	0	1	continuous[0,1]
8	Agent 1 absolute X coordination	0	1	continuous[0,1]
9	Agent 1 absolute Y coordination	0	1	continuous[0,1]
10	Agent 1 shield	0	1	continuous[0,1]
11	Agent 2 health	0	1	continuous[0,1]
12	Agent 2 weapon_cooldown	0	1	continuous[0,1]
13	Agent 2 absolute X coordinate	0	1	continuous[0,1]
14	Agent 2 absolute Y coordinate	0	1	continuous[0,1]
15	Agent 2 shield	0	1	continuous[0,1]
16	Agent 3 health	0	1	continuous[0,1]
17	Agent 3 Weapon_cooldown	0	1	continuous[0,1]
18	Agent 3 absolute X coordinate	0	1	continuous[0,1]
19	Agent 3 absolute Y coordinate	0	1	continuous[0,1]
20	Agent 3 shield	0	1	continuous[0,1]
21	Agent 4 health	0	1	continuous[0,1]
22	Agent 4 Weapon_cooldown	0	1	continuous[0,1]
23	Agent 4 absolute X coordinate	0	1	continuous[0,1]
24	Agent 4 absolute Y coordinate	0	1	continuous[0,1]
25	Agent 5 shield	0	1	continuous[0,1]
26	Enemy(Ultralisk) health	0	1	continuous[0,1]
27	Enemy(Ultralisk) absolute X coordinate	0	1	continuous[0,1]
28	Enemy(Ultralisk) absolute Y coordinate	0	1	continuous[0,1]

## Sheet: bane_vs_hM
1	Can move North at the current timestep	0	1	categorical[0 or 1]	Three Banelings attempt to take down a Hydralisk supported by a Medivac. Only when all three explode together can the Hydralisk be defeated, as any delay allows the Medivac to restore its health. To succeed, the Banelings must strike in perfect unison at the central junction of the T-shaped map, where the Hydralisk is positioned. This scenario requires agents to accurately perceive their -positio…
2	Can move South at the current timestep	0	1	categorical[0 or 1]
3	Can move East at the current timestep	0	1	categorical[0 or 1]
4	Can move West at the current timestep	0	1	categorical[0 or 1]
5	Is enemy visible	0	1	categorical[0 or 1]
6	Normalized distance to enemy0	0	1	continuous[0,1]
7	Relative X position of enemy0	0	1	continuous[0,1]
8	Relative Y position of enemy0	0	1	continuous[0,1]
9	Enemy1 health ratio	0	1	Unknown
10	Enemy1 shield ratio	0	1	Unknown
11	Is enemy visible	0	1	categorical
12	Normalized distance to enemy1	0	1	continuous[0,1]
13	Relative X position of enemy1	0	1	continuous[0,1]
14	Relative Y position of enemy1	0	1	continuous[0,1]
15	Enemy health ratio	0	1	Unknown
16	Enemy shield ratio	0	1	Unknown
17	Is ally1 visible	0	1	categorical[0 or 1]
18	Normalized distance to ally	0	1	continuous[0,1]
19	Relative X position of ally	0	1	continuous[0,1]
20	Relative Y position of ally	0	1	continuous[0,1]
21	Ally health ratio	0	1	Unknown
22	Ally shield ratio	0	1	Unknown
23	Is ally visible	0	1	categorical[0 or 1]
24	Normalized distance to ally	0	1	continuous[0,1]
25	Relative X position of ally	0	1	continuous[0,1]
26	Relative Y position of ally	0	1	continuous[0,1]
27	Ally health ratio	0	1	Unknown
28	Ally shield ratio	0	1	Unknown
29	Own unit type	0	1	categorical[0 or 1]
30	Own health ratio	0	1	Unknown
31	Own shield ratio	0	1	Unknown
32	Last Action-No-op(all last action:0)	0	1	categorical[0 or 1]
33	Last Action-Stop	0	1	categorical[0 or 1]
34	Last Action-Move North	0	1	categorical[0 or 1]
35	Last Action-Move South	0	1	categorical[0 or 1]
36	Last Action-Move East	0	1	categorical[0 or 1]
37	Last Action-Move West	0	1	categorical[0 or 1]
38	Last Action-Attack	0	1	categorical[0 or 1]
39	Last Action-Heal	0	1	categorical[0 or 1]
40	AgentID[0]	0	1	categorical[0 or 1]
41	AgentID[1]	0	1	categorical[0 or 1]
42	AgentID[2]	0	1	categorical[0 or 1]

## Sheet: bane_vs_hM(state)
1	Agent 0 health	0	1	continuous[0,1]	Three Banelings attempt to take down a Hydralisk supported by a Medivac. Only when all three explode together can the Hydralisk be defeated, as any delay allows the Medivac to restore its health. To succeed, the Banelings must strike in perfect unison at the central junction of the T-shaped map, where the Hydralisk is positioned. This scenario requires agents to accurately perceive their -positio…
2	Agent 0 weapon_cooldown	0	1	always 0
3	Agent 0 absolute X coordination	0	1	continuous[0,1]
4	Agent 0 absolute Y coordination	0	1	continuous[0,1]
5	Agent 0 shield	0	1	always 0
6	Agent 0 unit type	0	1	categorical[0 or 1]
7	Agent 1 health	0	1	continuous[0,1]
8	Agent 1 weapon_cooldown	0	1	always 0
9	Agent 1 absolute X coordinate	0	1	continuous[0,1]
10	Agent 1 absolute Y coordinate	0	1	continuous[0,1]
11	Agent 1 shield	0	1	always 0
12	Agent 1 unit type	0	1	categorical[0 or 1]
13	Agent 1 health	0	1	continuous[0,1]
14	Agent 2 weapon_cooldown	0	1	always 0
15	Agent 2 absolute X coordinate	0	1	continuous[0,1]
16	Agent 2 absolute Y coordinate	0	1	continuous[0,1]
17	Agent 2 shield	0	1	always 0
18	Agent 2 unit type	0	1	categorical[0 or 1]
19	Enemy(Hydralisk) health	0	1	continuous[0,1]
20	Enemy(Hydralisk) absolute X coordinate	0	1	continuous[0,1]
21	Enemy(Hydralisk) absolute Y coordinate	0	1	continuous[0,1]
22	Enemy(Hydralisk) shield	0	1	always 0
23	Enemy(Hydralisk) unit type	0	1	categorical[0 or 1]
24	Enemy(Medivac) health	0	1	continuous[0,1]
25	Enemy(Medivac) absolute X coordinate	0	1	continuous[0,1]
26	Enemy(Medivac) absolute Y coordinate	0	1	continuous[0,1]
27	Enemy(Medivac) shield	0	1	always 0
28	Enemy(Medivac) unit type	0	1	categorical[0 or 1]

## Sheet: 1o_10b_vs_1r
1	Can move North at the current timestep	0	1	categorical[0 or 1]	In a map full of cliffs, both the Overseer and the Roach spawn together at the same random location, while 10 Banelings spawn separately at random points across the map. The Overseer is able to detect the exact position of the Roach (an enemy unit), whereas the Banelings cannot. In a minimized communication strategy, the Banelings remain silent, and it becomes the Overseer’s responsibility to enc…
2	Can move South at the current timestep	0	1	categorical[0 or 1]
3	Can move East at the current timestep	0	1	categorical[0 or 1]
4	Can move West at the current timestep	0	1	categorical[0 or 1]
5	Is enemy visible	0	1	categorical[0 or 1]
6	Normalized distance to enemy	0	1	continuous
7	Relative X position of enemy	0	1	continuous
8	Relative Y position of enemy	0	1	continuous
9	Enemy health ratio	0	1	continuous
10	Enemy shield ratio	0	1	continuous
11	Enemy Unit type	0	1	categorical[0 or 1]
12	Enemy Unit type	0	1	categorical[0 or 1]
13	Is ally visible	0	1	categorical[0 or 1]
14	Normalized distance to ally	0	1	continuous
15	Relative X position of ally	0	1	continuous
16	Relative Y position of ally	0	1	continuous
17	Ally health ratio	0	1	continuous
18	Ally shield ratio	0	1	continuous
19	Ally Unity type	0	1	categorical[0 or 1]
20	Is ally visible	0	1	categorical[0 or 1]
21	Normalized distance to ally	0	1	continuous
22	Relative X position of ally	0	1	continuous
23	Relative Y position of ally	0	1	continuous
24	Ally health ratio	0	1	continuous
25	Ally shield ratio	0	1	continuous
26	Ally Unity type	0	1	categorical[0 or 1]
27	Is ally visible	0	1	categorical[0 or 1]
28	Normalized distance to ally	0	1	continuous
29	Relative X position of ally	0	1	continuous
30	Relative Y position of ally	0	1	continuous
31	Ally health ratio	0	1	continuous
32	Ally shield ratio	0	1	continuous
33	Ally Unity type	0	1	categorical[0 or 1]
34	Is ally visible	0	1	categorical[0 or 1]
35	Normalized distance to ally	0	1	continuous
36	Relative X position of ally	0	1	continuous
37	Relative Y position of ally	0	1	continuous
38	Ally health ratio	0	1	continuous
39	Ally shield ratio	0	1	continuous
40	Ally Unity type	0	1	categorical[0 or 1]
41	Is ally visible	0	1	categorical[0 or 1]
42	Normalized distance to ally	0	1	continuous
43	Relative X position of ally	0	1	continuous
44	Relative Y position of ally	0	1	continuous
45	Ally health ratio	0	1	continuous
46	Ally shield ratio	0	1	continuous
47	Ally Unity type	0	1	categorical[0 or 1]
48	Is ally visible	0	1	categorical[0 or 1]
49	Normalized distance to ally	0	1	continuous
50	Relative X position of ally	0	1	continuous
51	Relative Y position of ally	0	1	continuous
52	Ally health ratio	0	1	continuous
53	Ally shield ratio	0	1	continuous
54	Ally Unity type	0	1	categorical[0 or 1]
55	Is ally visible	0	1	categorical[0 or 1]
56	Normalized distance to ally	0	1	continuous
57	Relative X position of ally	0	1	continuous
58	Relative Y position of ally	0	1	continuous
59	Ally health ratio	0	1	continuous
60	Ally shield ratio	0	1	continuous
61	Ally Unity type	0	1	categorical[0 or 1]
62	Is ally visible	0	1	categorical[0 or 1]
63	Normalized distance to ally	0	1	continuous
64	Relative X position of ally	0	1	continuous
65	Relative Y position of ally	0	1	continuous
66	Ally health ratio	0	1	continuous
67	Ally shield ratio	0	1	continuous
68	Ally Unity type	0	1	categorical[0 or 1]
69	Is ally visible	0	1	categorical[0 or 1]
70	Normalized distance to ally	0	1	continuous
71	Relative X position of ally	0	1	continuous
72	Relative Y position of ally	0	1	continuous
73	Ally health ratio	0	1	continuous
74	Ally shield ratio	0	1	continuous
75	Ally Unity type	0	1	categorical[0 or 1]
76	Is ally visible	0	1	categorical[0 or 1]
77	Normalized distance to ally	0	1	continuous
78	Relative X position of ally	0	1	continuous
79	Relative Y position of ally	0	1	continuous
80	Ally health ratio	0	1	continuous
81	Ally shield ratio	0	1	continuous
82	Ally Unity type	0	1	categorical[0 or 1]
83	Own health ratio	0	1	continuous
84	Own shield ratio	0	1	continuous
85	Own Unit type	0	1	categorical[0 or 1]
86	Last Action-No-op(all last action:0)	0	1	categorical[0 or 1]
87	Last Action-Stop	0	1	categorical[0 or 1]
88	Last Action-Move North	0	1	categorical[0 or 1]
89	Last Action-Move South	0	1	categorical[0 or 1]
90	Last Action-Move East	0	1	categorical[0 or 1]
91	Last Action-Move West	0	1	categorical[0 or 1]
92	Last Action-Attack	0	1	categorical[0 or 1]
93	AgentID[0]	0	1	categorical[0 or 1]
94	AgentID[1]	0	1	categorical[0 or 1]
95	AgentID[2]	0	1	categorical[0 or 1]
96	AgentID[3]	0	1	categorical[0 or 1]
97	AgentID[4]	0	1	categorical[0 or 1]
98	AgentID[5]	0	1	categorical[0 or 1]
99	AgentID[6]	0	1	categorical[0 or 1]
100	AgentID[7]	0	1	categorical[0 or 1]
101	AgentID[8]	0	1	categorical[0 or 1]
102	AgentID[9]	0	1	categorical[0 or 1]
103	AgentID[10]	0	1	categorical[0 or 1]

## Sheet: 1o_10b_vs_1r(state)
1	Agent 0 health	0	1	continuous[0,1]	In a map full of cliffs, both the Overseer and the Roach spawn together at the same random location, while 10 Banelings spawn separately at random points across the map. The Overseer is able to detect the exact position of the Roach (an enemy unit), whereas the Banelings cannot. In a minimized communication strategy, the Banelings remain silent, and it becomes the Overseer’s responsibility to enc…
2	Agent 0 weapon_cooldown	0	1	always 0
3	Agent 0 absolute X coordination	-1	1	continuous[0,1]
4	Agent 0 absolute Y coordination	-1	1	continuous[0,1]
5	Agent 0 shield	0	1	continuous[0,1]
6	Agent 0 unit type	0	1	categorical[0 or 1]
7	Agent 1 health	0	1	continuous[0,1]
8	Agent 1 weapon_cooldown	0	1	always 0
9	Agent 1 absolute X coordination	-1	1	continuous[0,1]
10	Agent 1 absolute Y coordination	-1	1	continuous[0,1]
11	Agent 1 shield	0	1	continuous[0,1]
12	Agent 1 unit type	0	1	categorical[0 or 1]
13	Agent 2 health	0	1	continuous[0,1]
14	Agent 2 weapon_cooldown	0	1	always 0
15	Agent 2 absolute X coordination	-1	1	continuous[0,1]
16	Agent 2 absolute Y coordination	-1	1	continuous[0,1]
17	Agent 2 shield	0	1	continuous[0,1]
18	Agent 2 unit type	0	1	categorical[0 or 1]
19	Agent 3 health	0	1	continuous[0,1]
20	Agent 3 weapon_cooldown	0	1	always 0
21	Agent 3 absolute X coordination	-1	1	continuous[0,1]
22	Agent 3 absolute Y coordination	-1	1	continuous[0,1]
23	Agent 3 shield	0	1	continuous[0,1]
24	Agent 3 unit type	0	1	categorical[0 or 1]
25	Agent 4 health	0	1	continuous[0,1]
26	Agent 4 weapon_cooldown	0	1	always 0
27	Agent 4 absolute X coordination	-1	1	continuous[0,1]
28	Agent 4 absolute Y coordination	-1	1	continuous[0,1]
29	Agent 4 shield	0	1	continuous[0,1]
30	Agent 4 unit type	0	1	categorical[0 or 1]
31	Agent 5 health	0	1	continuous[0,1]
32	Agent 5 weapon_cooldown	0	1	always 0
33	Agent 5 absolute X coordination	-1	1	continuous[0,1]
34	Agent 5 absolute Y coordination	-1	1	continuous[0,1]
35	Agent 5 shield	0	1	continuous[0,1]
36	Agent 5 unit type	0	1	categorical[0 or 1]
37	Agent 6 health	0	1	continuous[0,1]
38	Agent 6 weapon_cooldown	0	1	always 0
39	Agent 6 absolute X coordination	-1	1	continuous[0,1]
40	Agent 6 absolute Y coordination	-1	1	continuous[0,1]
41	Agent 6 shield	0	1	continuous[0,1]
42	Agent 6 unit type	0	1	categorical[0 or 1]
43	Agent 7 health	0	1	continuous[0,1]
44	Agent 7 weapon_cooldown	0	1	always 0
45	Agent 7 absolute X coordination	-1	1	continuous[0,1]
46	Agent 7 absolute Y coordination	-1	1	continuous[0,1]
47	Agent 7 shield	0	1	continuous[0,1]
48	Agent 7 unit type	0	1	categorical[0 or 1]
49	Agent 8 health	0	1	continuous[0,1]
50	Agent 8 weapon_cooldown	0	1	always 0
51	Agent 8 absolute X coordination	-1	1	continuous[0,1]
52	Agent 8 absolute Y coordination	-1	1	continuous[0,1]
53	Agent 8 shield	0	1	continuous[0,1]
54	Agent 8 unit type	0	1	categorical[0 or 1]
55	Agent 9 health	0	1	continuous[0,1]
56	Agent 9 weapon_cooldown	0	1	always 0
57	Agent 9 absolute X coordination	-1	1	continuous[0,1]
58	Agent 9 absolute Y coordination	-1	1	continuous[0,1]
59	Agent 9 shield	0	1	continuous[0,1]
60	Agent 9 unit type	0	1	categorical[0 or 1]
61	Agent 10 health	0	1	continuous[0,1]
62	Agent 10 weapon_cooldown	0	1	always 0
63	Agent 10 absolute X coordination	-1	1	continuous[0,1]
64	Agent 10 absolute Y coordination	-1	1	continuous[0,1]
65	Agent 10 shield	0	1	continuous[0,1]
66	Agent 10 unit type	0	1	categorical[0 or 1]
67	Enemy health	0	1	continuous[0,1]
68	Enemy absolute X coordinate	0	1	continuous[0,1]
69	Enemy absolute Y coordinate	0	1	continuous[0,1]
70	Enemy shield	0	1	continuous[0,1]
71	Enemy unit type	0	1	always 0

## Sheet: 2o_20b_vs_2r
1	Can move North at the current timestep	0	1	categorical[0 or 1]	In a map full of cliffs, both the Overseers and the Roaches spawn together at the same random location, while 20 Banelings spawn separately at random points across the map. The Overseers are able to detect the exact position of the Roaches (enemy units), whereas the Banelings cannot. In a minimized communication strategy, the Banelings remain silent, and it becomes the Overseers’ responsibility t…
2	Can move South at the current timestep	0	1	categorical[0 or 1]
3	Can move East at the current timestep	0	1	categorical[0 or 1]
4	Can move West at the current timestep	0	1	categorical[0 or 1]
5	Enemy0: Is enemy visible/attackable	0	1	categorical[0 or 1]
6	Enemy0: Normalized distance	0	1	continuous
7	Enemy0: Relative X position	-1	1	continuous
8	Enemy0: Relative Y position	-1	1	continuous
9	Enemy0: Health ratio	0	1	continuous
10	Enemy0: Dummy padding (always 0)	0	0	constant
11	Enemy0: Unit type one-hot [0]	0	1	categorical[0 or 1]
12	Enemy0: Unit type one-hot [1]	0	1	categorical[0 or 1]
13	Enemy1: Is enemy visible/attackable	0	1	categorical[0 or 1]
14	Enemy1: Normalized distance	0	1	continuous
15	Enemy1: Relative X position	-1	1	continuous
16	Enemy1: Relative Y position	-1	1	continuous
17	Enemy1: Health ratio	0	1	continuous
18	Enemy1: Dummy padding (always 0)	0	0	constant
19	Enemy1: Unit type one-hot [0]	0	1	categorical[0 or 1]
20	Enemy1: Unit type one-hot [1]	0	1	categorical[0 or 1]
21	Ally0: Visible flag	0	1	categorical[0 or 1]
22	Ally0: Normalized distance	0	1	continuous
23	Ally0: Relative X position	-1	1	continuous
24	Ally0: Relative Y position	-1	1	continuous
25	Ally0: Health ratio	0	1	continuous
26	Ally0: Unit type one-hot [0]	0	1	categorical[0 or 1]
27	Ally0: Unit type one-hot [1]	0	1	categorical[0 or 1]
28	Ally1: Visible flag	0	1	categorical[0 or 1]
29	Ally1: Normalized distance	0	1	continuous
30	Ally1: Relative X position	-1	1	continuous
31	Ally1: Relative Y position	-1	1	continuous
32	Ally1: Health ratio	0	1	continuous
33	Ally1: Unit type one-hot [0]	0	1	categorical[0 or 1]
34	Ally1: Unit type one-hot [1]	0	1	categorical[0 or 1]
35	Ally2: Visible flag	0	1	categorical[0 or 1]
36	Ally2: Normalized distance	0	1	continuous
37	Ally2: Relative X position	-1	1	continuous
38	Ally2: Relative Y position	-1	1	continuous
39	Ally2: Health ratio	0	1	continuous
40	Ally2: Unit type one-hot [0]	0	1	categorical[0 or 1]
41	Ally2: Unit type one-hot [1]	0	1	categorical[0 or 1]
42	Ally3: Visible flag	0	1	categorical[0 or 1]
43	Ally3: Normalized distance	0	1	continuous
44	Ally3: Relative X position	-1	1	continuous
45	Ally3: Relative Y position	-1	1	continuous
46	Ally3: Health ratio	0	1	continuous
47	Ally3: Unit type one-hot [0]	0	1	categorical[0 or 1]
48	Ally3: Unit type one-hot [1]	0	1	categorical[0 or 1]
49	Ally4: Visible flag	0	1	categorical[0 or 1]
50	Ally4: Normalized distance	0	1	continuous
51	Ally4: Relative X position	-1	1	continuous
52	Ally4: Relative Y position	-1	1	continuous
53	Ally4: Health ratio	0	1	continuous
54	Ally4: Unit type one-hot [0]	0	1	categorical[0 or 1]
55	Ally4: Unit type one-hot [1]	0	1	categorical[0 or 1]
56	Ally5: Visible flag	0	1	categorical[0 or 1]
57	Ally5: Normalized distance	0	1	continuous
58	Ally5: Relative X position	-1	1	continuous
59	Ally5: Relative Y position	-1	1	continuous
60	Ally5: Health ratio	0	1	continuous
61	Ally5: Unit type one-hot [0]	0	1	categorical[0 or 1]
62	Ally5: Unit type one-hot [1]	0	1	categorical[0 or 1]
63	Ally6: Visible flag	0	1	categorical[0 or 1]
64	Ally6: Normalized distance	0	1	continuous
65	Ally6: Relative X position	-1	1	continuous
66	Ally6: Relative Y position	-1	1	continuous
67	Ally6: Health ratio	0	1	continuous
68	Ally6: Unit type one-hot [0]	0	1	categorical[0 or 1]
69	Ally6: Unit type one-hot [1]	0	1	categorical[0 or 1]
70	Ally7: Visible flag	0	1	categorical[0 or 1]
71	Ally7: Normalized distance	0	1	continuous
72	Ally7: Relative X position	-1	1	continuous
73	Ally7: Relative Y position	-1	1	continuous
74	Ally7: Health ratio	0	1	continuous
75	Ally7: Unit type one-hot [0]	0	1	categorical[0 or 1]
76	Ally7: Unit type one-hot [1]	0	1	categorical[0 or 1]
77	Ally8: Visible flag	0	1	categorical[0 or 1]
78	Ally8: Normalized distance	0	1	continuous
79	Ally8: Relative X position	-1	1	continuous
80	Ally8: Relative Y position	-1	1	continuous
81	Ally8: Health ratio	0	1	continuous
82	Ally8: Unit type one-hot [0]	0	1	categorical[0 or 1]
83	Ally8: Unit type one-hot [1]	0	1	categorical[0 or 1]
84	Ally9: Visible flag	0	1	categorical[0 or 1]
85	Ally9: Normalized distance	0	1	continuous
86	Ally9: Relative X position	-1	1	continuous
87	Ally9: Relative Y position	-1	1	continuous
88	Ally9: Health ratio	0	1	continuous
89	Ally9: Unit type one-hot [0]	0	1	categorical[0 or 1]
90	Ally9: Unit type one-hot [1]	0	1	categorical[0 or 1]
91	Ally10: Visible flag	0	1	categorical[0 or 1]
92	Ally10: Normalized distance	0	1	continuous
93	Ally10: Relative X position	-1	1	continuous
94	Ally10: Relative Y position	-1	1	continuous
95	Ally10: Health ratio	0	1	continuous
96	Ally10: Unit type one-hot [0]	0	1	categorical[0 or 1]
97	Ally10: Unit type one-hot [1]	0	1	categorical[0 or 1]
98	Ally11: Visible flag	0	1	categorical[0 or 1]
99	Ally11: Normalized distance	0	1	continuous
100	Ally11: Relative X position	-1	1	continuous
101	Ally11: Relative Y position	-1	1	continuous
102	Ally11: Health ratio	0	1	continuous
103	Ally11: Unit type one-hot [0]	0	1	categorical[0 or 1]
104	Ally11: Unit type one-hot [1]	0	1	categorical[0 or 1]
105	Ally12: Visible flag	0	1	categorical[0 or 1]
106	Ally12: Normalized distance	0	1	continuous
107	Ally12: Relative X position	-1	1	continuous
108	Ally12: Relative Y position	-1	1	continuous
109	Ally12: Health ratio	0	1	continuous
110	Ally12: Unit type one-hot [0]	0	1	categorical[0 or 1]
111	Ally12: Unit type one-hot [1]	0	1	categorical[0 or 1]
112	Ally13: Visible flag	0	1	categorical[0 or 1]
113	Ally13: Normalized distance	0	1	continuous
114	Ally13: Relative X position	-1	1	continuous
115	Ally13: Relative Y position	-1	1	continuous
116	Ally13: Health ratio	0	1	continuous
117	Ally13: Unit type one-hot [0]	0	1	categorical[0 or 1]
118	Ally13: Unit type one-hot [1]	0	1	categorical[0 or 1]
119	Ally14: Visible flag	0	1	categorical[0 or 1]
120	Ally14: Normalized distance	0	1	continuous
121	Ally14: Relative X position	-1	1	continuous
122	Ally14: Relative Y position	-1	1	continuous
123	Ally14: Health ratio	0	1	continuous
124	Ally14: Unit type one-hot [0]	0	1	categorical[0 or 1]
125	Ally14: Unit type one-hot [1]	0	1	categorical[0 or 1]
126	Ally15: Visible flag	0	1	categorical[0 or 1]
127	Ally15: Normalized distance	0	1	continuous
128	Ally15: Relative X position	-1	1	continuous
129	Ally15: Relative Y position	-1	1	continuous
130	Ally15: Health ratio	0	1	continuous
131	Ally15: Unit type one-hot [0]	0	1	categorical[0 or 1]
132	Ally15: Unit type one-hot [1]	0	1	categorical[0 or 1]
133	Ally16: Visible flag	0	1	categorical[0 or 1]
134	Ally16: Normalized distance	0	1	continuous
135	Ally16: Relative X position	-1	1	continuous
136	Ally16: Relative Y position	-1	1	continuous
137	Ally16: Health ratio	0	1	continuous
138	Ally16: Unit type one-hot [0]	0	1	categorical[0 or 1]
139	Ally16: Unit type one-hot [1]	0	1	categorical[0 or 1]
140	Ally17: Visible flag	0	1	categorical[0 or 1]
141	Ally17: Normalized distance	0	1	continuous
142	Ally17: Relative X position	-1	1	continuous
143	Ally17: Relative Y position	-1	1	continuous
144	Ally17: Health ratio	0	1	continuous
145	Ally17: Unit type one-hot [0]	0	1	categorical[0 or 1]
146	Ally17: Unit type one-hot [1]	0	1	categorical[0 or 1]
147	Ally18: Visible flag	0	1	categorical[0 or 1]
148	Ally18: Normalized distance	0	1	continuous
149	Ally18: Relative X position	-1	1	continuous
150	Ally18: Relative Y position	-1	1	continuous
151	Ally18: Health ratio	0	1	continuous
152	Ally18: Unit type one-hot [0]	0	1	categorical[0 or 1]
153	Ally18: Unit type one-hot [1]	0	1	categorical[0 or 1]
154	Ally19: Visible flag	0	1	categorical[0 or 1]
155	Ally19: Normalized distance	0	1	continuous
156	Ally19: Relative X position	-1	1	continuous
157	Ally19: Relative Y position	-1	1	continuous
158	Ally19: Health ratio	0	1	continuous
159	Ally19: Unit type one-hot [0]	0	1	categorical[0 or 1]
160	Ally19: Unit type one-hot [1]	0	1	categorical[0 or 1]
161	Ally20: Visible flag	0	1	categorical[0 or 1]
162	Ally20: Normalized distance	0	1	continuous
163	Ally20: Relative X position	-1	1	continuous
164	Ally20: Relative Y position	-1	1	continuous
165	Ally20: Health ratio	0	1	continuous
166	Ally20: Unit type one-hot [0]	0	1	categorical[0 or 1]
167	Ally20: Unit type one-hot [1]	0	1	categorical[0 or 1]
168	Own: Health ratio	0	1	continuous
169	Own: Unit type one-hot [0]	0	1	categorical[0 or 1]
170	Own: Unit type one-hot [1]	0	1	categorical[0 or 1]
171	Last action: no-op	0	1	categorical[0 or 1]
172	Last action: stop	0	1	categorical[0 or 1]
173	Last action: move North	0	1	categorical[0 or 1]
174	Last action: move South	0	1	categorical[0 or 1]
175	Last action: move East	0	1	categorical[0 or 1]
176	Last action: move West	0	1	categorical[0 or 1]
177	Last action: attack enemy0	0	1	categorical[0 or 1]
178	Last action: attack enemy1	0	1	categorical[0 or 1]
179	AgentID[0]	0	1	categorical[0 or 1]
180	AgentID[1]	0	1	categorical[0 or 1]
181	AgentID[2]	0	1	categorical[0 or 1]
182	AgentID[3]	0	1	categorical[0 or 1]
183	AgentID[4]	0	1	categorical[0 or 1]
184	AgentID[5]	0	1	categorical[0 or 1]
185	AgentID[6]	0	1	categorical[0 or 1]
186	AgentID[7]	0	1	categorical[0 or 1]
187	AgentID[8]	0	1	categorical[0 or 1]
188	AgentID[9]	0	1	categorical[0 or 1]
189	AgentID[10]	0	1	categorical[0 or 1]
190	AgentID[11]	0	1	categorical[0 or 1]
191	AgentID[12]	0	1	categorical[0 or 1]
192	AgentID[13]	0	1	categorical[0 or 1]
193	AgentID[14]	0	1	categorical[0 or 1]
194	AgentID[15]	0	1	categorical[0 or 1]
195	AgentID[16]	0	1	categorical[0 or 1]
196	AgentID[17]	0	1	categorical[0 or 1]
197	AgentID[18]	0	1	categorical[0 or 1]
198	AgentID[19]	0	1	categorical[0 or 1]
199	AgentID[20]	0	1	categorical[0 or 1]
200	AgentID[21]	0	1	categorical[0 or 1]

## Sheet: 2o_20b_vs_2r(state)
1	Agent 1 health	0	1	continuous[0,1]	In a map full of cliffs, both the Overseers and the Roaches spawn together at the same random location, while 20 Banelings spawn separately at random points across the map. The Overseers are able to detect the exact position of the Roaches (enemy units), whereas the Banelings cannot. In a minimized communication strategy, the Banelings remain silent, and it becomes the Overseers’ responsibility t…
2	Agent 1 weapon_cooldown_or_energy	0	1	continuous[0,1]
3	Agent 1 absolute X coordination	-1	1	continuous[-1,1]
4	Agent 1 absolute Y coordination	-1	1	continuous[-1,1]
5	Agent 1 unit type [0]	0	1	categorical[0 or 1]
6	Agent 1 unit type [1]	0	1	categorical[0 or 1]
7	Agent 2 health	0	1	continuous[0,1]
8	Agent 2 weapon_cooldown_or_energy	0	1	continuous[0,1]
9	Agent 2 absolute X coordination	-1	1	continuous[-1,1]
10	Agent 2 absolute Y coordination	-1	1	continuous[-1,1]
11	Agent 2 unit type [0]	0	1	categorical[0 or 1]
12	Agent 2 unit type [1]	0	1	categorical[0 or 1]
13	Agent 3 health	0	1	continuous[0,1]
14	Agent 3 weapon_cooldown_or_energy	0	1	continuous[0,1]
15	Agent 3 absolute X coordination	-1	1	continuous[-1,1]
16	Agent 3 absolute Y coordination	-1	1	continuous[-1,1]
17	Agent 3 unit type [0]	0	1	categorical[0 or 1]
18	Agent 3 unit type [1]	0	1	categorical[0 or 1]
19	Agent 4 health	0	1	continuous[0,1]
20	Agent 4 weapon_cooldown_or_energy	0	1	continuous[0,1]
21	Agent 4 absolute X coordination	-1	1	continuous[-1,1]
22	Agent 4 absolute Y coordination	-1	1	continuous[-1,1]
23	Agent 4 unit type [0]	0	1	categorical[0 or 1]
24	Agent 4 unit type [1]	0	1	categorical[0 or 1]
25	Agent 5 health	0	1	continuous[0,1]
26	Agent 5 weapon_cooldown_or_energy	0	1	continuous[0,1]
27	Agent 5 absolute X coordination	-1	1	continuous[-1,1]
28	Agent 5 absolute Y coordination	-1	1	continuous[-1,1]
29	Agent 5 unit type [0]	0	1	categorical[0 or 1]
30	Agent 5 unit type [1]	0	1	categorical[0 or 1]
31	Agent 6 health	0	1	continuous[0,1]
32	Agent 6 weapon_cooldown_or_energy	0	1	continuous[0,1]
33	Agent 6 absolute X coordination	-1	1	continuous[-1,1]
34	Agent 6 absolute Y coordination	-1	1	continuous[-1,1]
35	Agent 6 unit type [0]	0	1	categorical[0 or 1]
36	Agent 6 unit type [1]	0	1	categorical[0 or 1]
37	Agent 7 health	0	1	continuous[0,1]
38	Agent 7 weapon_cooldown_or_energy	0	1	continuous[0,1]
39	Agent 7 absolute X coordination	-1	1	continuous[-1,1]
40	Agent 7 absolute Y coordination	-1	1	continuous[-1,1]
41	Agent 7 unit type [0]	0	1	categorical[0 or 1]
42	Agent 7 unit type [1]	0	1	categorical[0 or 1]
43	Agent 8 health	0	1	continuous[0,1]
44	Agent 8 weapon_cooldown_or_energy	0	1	continuous[0,1]
45	Agent 8 absolute X coordination	-1	1	continuous[-1,1]
46	Agent 8 absolute Y coordination	-1	1	continuous[-1,1]
47	Agent 8 unit type [0]	0	1	categorical[0 or 1]
48	Agent 8 unit type [1]	0	1	categorical[0 or 1]
49	Agent 9 health	0	1	continuous[0,1]
50	Agent 9 weapon_cooldown_or_energy	0	1	continuous[0,1]
51	Agent 9 absolute X coordination	-1	1	continuous[-1,1]
52	Agent 9 absolute Y coordination	-1	1	continuous[-1,1]
53	Agent 9 unit type [0]	0	1	categorical[0 or 1]
54	Agent 9 unit type [1]	0	1	categorical[0 or 1]
55	Agent 10 health	0	1	continuous[0,1]
56	Agent 10 weapon_cooldown_or_energy	0	1	continuous[0,1]
57	Agent 10 absolute X coordination	-1	1	continuous[-1,1]
58	Agent 10 absolute Y coordination	-1	1	continuous[-1,1]
59	Agent 10 unit type [0]	0	1	categorical[0 or 1]
60	Agent 10 unit type [1]	0	1	categorical[0 or 1]
61	Agent 11 health	0	1	continuous[0,1]
62	Agent 11 weapon_cooldown_or_energy	0	1	continuous[0,1]
63	Agent 11 absolute X coordination	-1	1	continuous[-1,1]
64	Agent 11 absolute Y coordination	-1	1	continuous[-1,1]
65	Agent 11 unit type [0]	0	1	categorical[0 or 1]
66	Agent 11 unit type [1]	0	1	categorical[0 or 1]
67	Agent 12 health	0	1	continuous[0,1]
68	Agent 12 weapon_cooldown_or_energy	0	1	continuous[0,1]
69	Agent 12 absolute X coordination	-1	1	continuous[-1,1]
70	Agent 12 absolute Y coordination	-1	1	continuous[-1,1]
71	Agent 12 unit type [0]	0	1	categorical[0 or 1]
72	Agent 12 unit type [1]	0	1	categorical[0 or 1]
73	Agent 13 health	0	1	continuous[0,1]
74	Agent 13 weapon_cooldown_or_energy	0	1	continuous[0,1]
75	Agent 13 absolute X coordination	-1	1	continuous[-1,1]
76	Agent 13 absolute Y coordination	-1	1	continuous[-1,1]
77	Agent 13 unit type [0]	0	1	categorical[0 or 1]
78	Agent 13 unit type [1]	0	1	categorical[0 or 1]
79	Agent 14 health	0	1	continuous[0,1]
80	Agent 14 weapon_cooldown_or_energy	0	1	continuous[0,1]
81	Agent 14 absolute X coordination	-1	1	continuous[-1,1]
82	Agent 14 absolute Y coordination	-1	1	continuous[-1,1]
83	Agent 14 unit type [0]	0	1	categorical[0 or 1]
84	Agent 14 unit type [1]	0	1	categorical[0 or 1]
85	Agent 15 health	0	1	continuous[0,1]
86	Agent 15 weapon_cooldown_or_energy	0	1	continuous[0,1]
87	Agent 15 absolute X coordination	-1	1	continuous[-1,1]
88	Agent 15 absolute Y coordination	-1	1	continuous[-1,1]
89	Agent 15 unit type [0]	0	1	categorical[0 or 1]
90	Agent 15 unit type [1]	0	1	categorical[0 or 1]
91	Agent 16 health	0	1	continuous[0,1]
92	Agent 16 weapon_cooldown_or_energy	0	1	continuous[0,1]
93	Agent 16 absolute X coordination	-1	1	continuous[-1,1]
94	Agent 16 absolute Y coordination	-1	1	continuous[-1,1]
95	Agent 16 unit type [0]	0	1	categorical[0 or 1]
96	Agent 16 unit type [1]	0	1	categorical[0 or 1]
97	Agent 17 health	0	1	continuous[0,1]
98	Agent 17 weapon_cooldown_or_energy	0	1	continuous[0,1]
99	Agent 17 absolute X coordination	-1	1	continuous[-1,1]
100	Agent 17 absolute Y coordination	-1	1	continuous[-1,1]
101	Agent 17 unit type [0]	0	1	categorical[0 or 1]
102	Agent 17 unit type [1]	0	1	categorical[0 or 1]
103	Agent 18 health	0	1	continuous[0,1]
104	Agent 18 weapon_cooldown_or_energy	0	1	continuous[0,1]
105	Agent 18 absolute X coordination	-1	1	continuous[-1,1]
106	Agent 18 absolute Y coordination	-1	1	continuous[-1,1]
107	Agent 18 unit type [0]	0	1	categorical[0 or 1]
108	Agent 18 unit type [1]	0	1	categorical[0 or 1]
109	Agent 19 health	0	1	continuous[0,1]
110	Agent 19 weapon_cooldown_or_energy	0	1	continuous[0,1]
111	Agent 19 absolute X coordination	-1	1	continuous[-1,1]
112	Agent 19 absolute Y coordination	-1	1	continuous[-1,1]
113	Agent 19 unit type [0]	0	1	categorical[0 or 1]
114	Agent 19 unit type [1]	0	1	categorical[0 or 1]
115	Agent 20 health	0	1	continuous[0,1]
116	Agent 20 weapon_cooldown_or_energy	0	1	continuous[0,1]
117	Agent 20 absolute X coordination	-1	1	continuous[-1,1]
118	Agent 20 absolute Y coordination	-1	1	continuous[-1,1]
119	Agent 20 unit type [0]	0	1	categorical[0 or 1]
120	Agent 20 unit type [1]	0	1	categorical[0 or 1]
121	Agent 21 health	0	1	continuous[0,1]
122	Agent 21 weapon_cooldown_or_energy	0	1	continuous[0,1]
123	Agent 21 absolute X coordination	-1	1	continuous[-1,1]
124	Agent 21 absolute Y coordination	-1	1	continuous[-1,1]
125	Agent 21 unit type [0]	0	1	categorical[0 or 1]
126	Agent 21 unit type [1]	0	1	categorical[0 or 1]
127	Agent 22 health	0	1	continuous[0,1]
128	Agent 22 weapon_cooldown_or_energy	0	1	continuous[0,1]
129	Agent 22 absolute X coordination	-1	1	continuous[-1,1]
130	Agent 22 absolute Y coordination	-1	1	continuous[-1,1]
131	Agent 22 unit type [0]	0	1	categorical[0 or 1]
132	Agent 22 unit type [1]	0	1	categorical[0 or 1]
133	Enemy 1 health	0	1	continuous[0,1]
134	Enemy 1 absolute X coordination	-1	1	continuous[-1,1]
135	Enemy 1 absolute Y coordination	-1	1	continuous[-1,1]
136	Enemy 1 unit type [0]	0	1	categorical[0 or 1]
137	Enemy 1 unit type [1]	0	1	categorical[0 or 1]
138	Enemy 2 health	0	1	continuous[0,1]
139	Enemy 2 absolute X coordination	-1	1	continuous[-1,1]
140	Enemy 2 absolute Y coordination	-1	1	continuous[-1,1]
141	Enemy 2 unit type [0]	0	1	categorical[0 or 1]
142	Enemy 2 unit type [1]	0	1	categorical[0 or 1]
